# Supplementary material
Source: PubMed Central journal article supplement (PMC3256718)

Table S1. Housekeeping genes extracted from 15 *S. pyogenes* strains, from used for two strains of subsp. *zooepidemicus*, four strains of *S. dysgalactiae* subsp. *equisimilis*, and one strain of *S. dysgalactiae* subsp. *dysgalactiae*. The concatenated sequences were used for more comprehensive phylogenetic analysis.

---

16S rRNA methyltransferase GidB  
 16S rRNA-processing protein RimM  
 3-dehydroquinate dehydratase  
 3-exo-deoxyribonuclease  
 4-diphosphocytidyl-2-C-methyl-D-erythritol kinase  
 6-phospho-beta-glucosidase  
 ABC transporter permease  
 ATP-dependent Clp protease proteolytic subunit  
 ATP-dependent RNA helicase  
 DNA mismatch repair protein MutS  
 DNA polymerase IV  
 DNA topoisomerase IV subunit A  
 DNA-directed RNA polymerase subunit alpha  
 DNA-directed RNA polymerase subunit beta  
 GMP synthase  
 GTP-binding protein EngA  
 L-asparaginase  
 L-lactate dehydrogenase  
 L-ribulose-5-phosphate 4-epimerase  
 N-acetylglucosamine-6-phosphate deacetylase  
 N-acetylneuraminase lyase  
 NAD synthetase  
 NADH dehydrogenase  
 RNA polymerase sigma factor RpoD  
 SWFSNF family helicase  
 UDP-N-acetylenolpyruvoylglucosamine reductase  
 UDP-N-acetylmuramate--L-alanine ligase  
 UDP-N-acetylmuramoyl-L-alanyl-D-glutamate synthetase  
 acetate kinase  
 acetyl-CoA carboxylase subunit beta  
 adenylate kinase  
 adenylosuccinate synthetase  
 alanyl-tRNA synthetase  
 alcohol dehydrogenase  
 alkyl hydroperoxidase  
 aspartate aminotransferase  
 aspartyl-tRNA synthetase  
 bifunctional acetaldehyde-CoA alcohol dehydrogenase  
 calcium-transporting ATPase  
 copper homeostasis protein  
 cytoplasmic membrane protein  
 dihydroorotate dehydrogenase 1A  
 foldase protein PrsA  
 fructose-6-phosphate aldolase  
 galactosamine-6-phosphate deaminase  
 glucosamine--fructose-6-phosphate aminotransferase  
 glucosamine-6-phosphate isomerase  
 glutamate racemase  
 glutamine synthetase

glutamyl aminopeptidase  
glutamyl-tRNA synthetase  
glycerol dehydrogenase  
glycerol-3-phosphate acyltransferase PlsX  
high-affinity zinc uptake system membrane protein  
hypoxanthine-guanine phosphoribosyl transferase  
inorganic polyphosphateATP-NAD kinase  
inosine 5-monophosphate dehydrogenase  
lysyl-tRNA synthetase  
manganese transport system ATP-binding protein  
oligopeptide ABC transporter ATP-binding protein  
oligopeptide-binding protein  
peptidyl-tRNA hydrolase  
potassium uptake protein  
preprotein translocase subunit SecY  
pyrroline-5-carboxylate reductase  
recombination factor protein RarA  
ribose-phosphate pyrophosphokinase  
ribosomal protein L11 methyltransferase  
ribosome-binding factor A  
shikimate 5-dehydrogenase  
tRNA delta(2)-isopentenylpyrophosphate transferase  
tRNA pseudouridine synthase B  
tRNA(Ile)-lysine synthetase  
threonyl-tRNA synthetase  
thymidylate kinase  
transcription elongation factor GreA  
transcription-repair coupling factor  
translation initiation factor IF-1  
tryptophanyl-tRNA synthetase II  
tyrosyl-tRNA synthetase  
undecaprenyldiphospho-muramoylpen  
uracil phosphoribosyltransferase

---

## Supplementary figures

**Figure S1a-g.** Minimum evolution trees based on individual housekeeping genes and showing the position of the 112 strains of *S. dysgalactiae*, *S. equi*, *S. canis*, and *S. pyogenes*. The strains are colour labelled according to the clustering using the concatenated sequences: (*S. dysgalactiae* subsp. *equisimilis* subcluster 1 [grey], *S. dysgalactiae* subsp. *equisimilis* subcluster 2 [purple], *S. dysgalactiae* subsp. *dysgalactiae* subcluster 1 [blue], *S. dysgalactiae* subsp. *dysgalactiae* subcluster 2 [turquoise], *S. pyogenes* [yellow], *S. canis* [green], *S. equi* subspecies [orange]). Bootstrap values for major branches are shown. a: *map*; b:*pfl*; c: *ppaC*; d: *pyk*; e: *rpoβ*; f: *sodA*; g: *tuf*.

Fig. S1a (*map*)

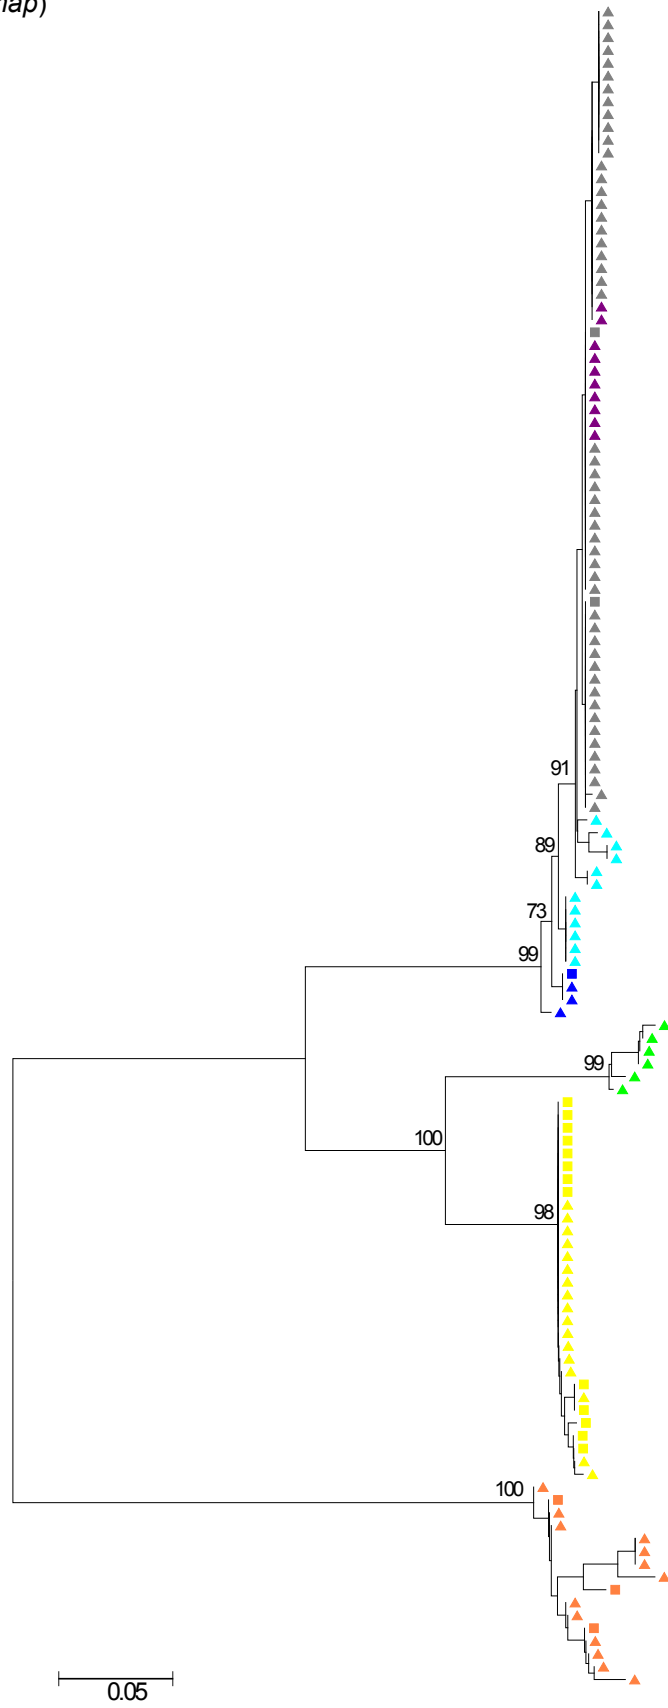

Fig. S1b (*pfl*)

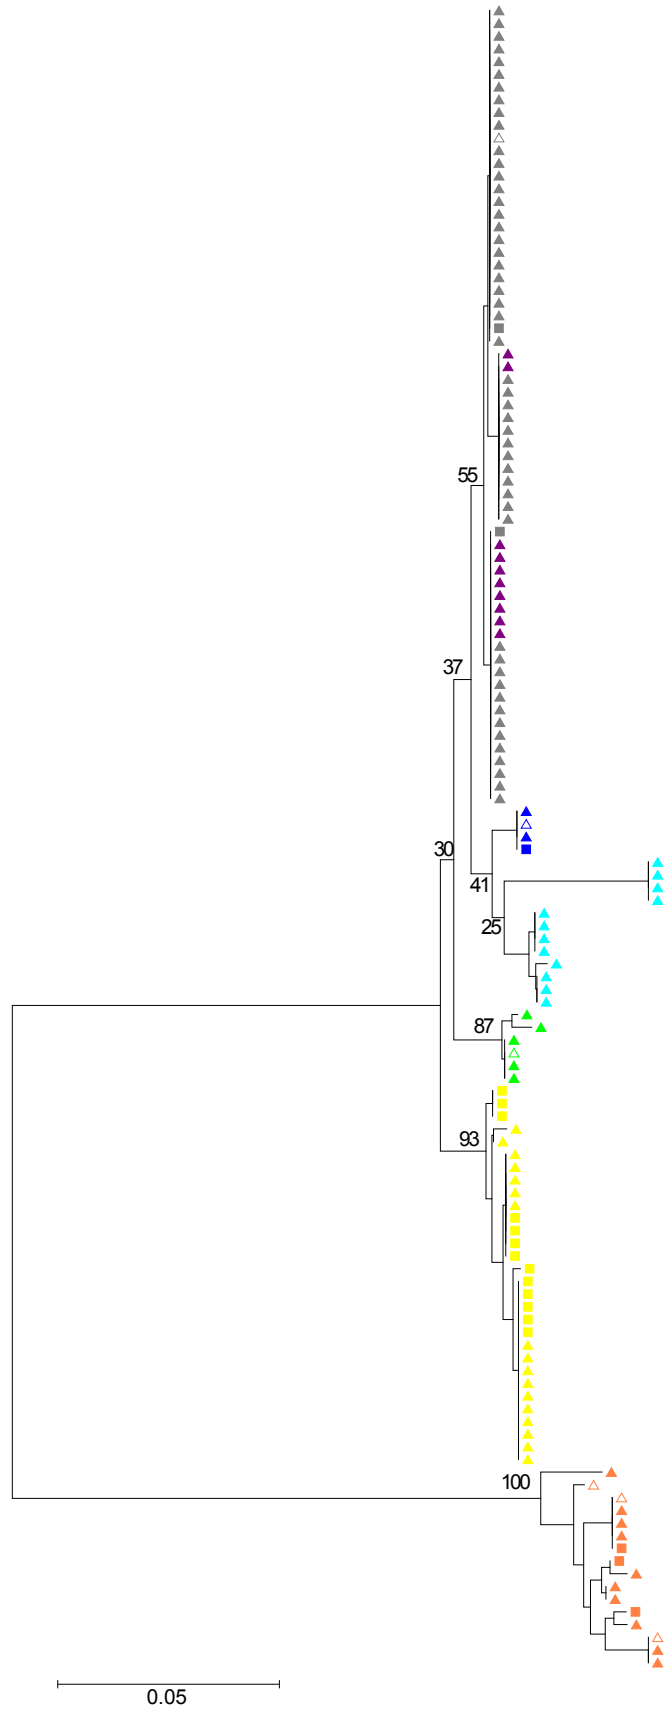

Fig. S1c (*ppaC*)

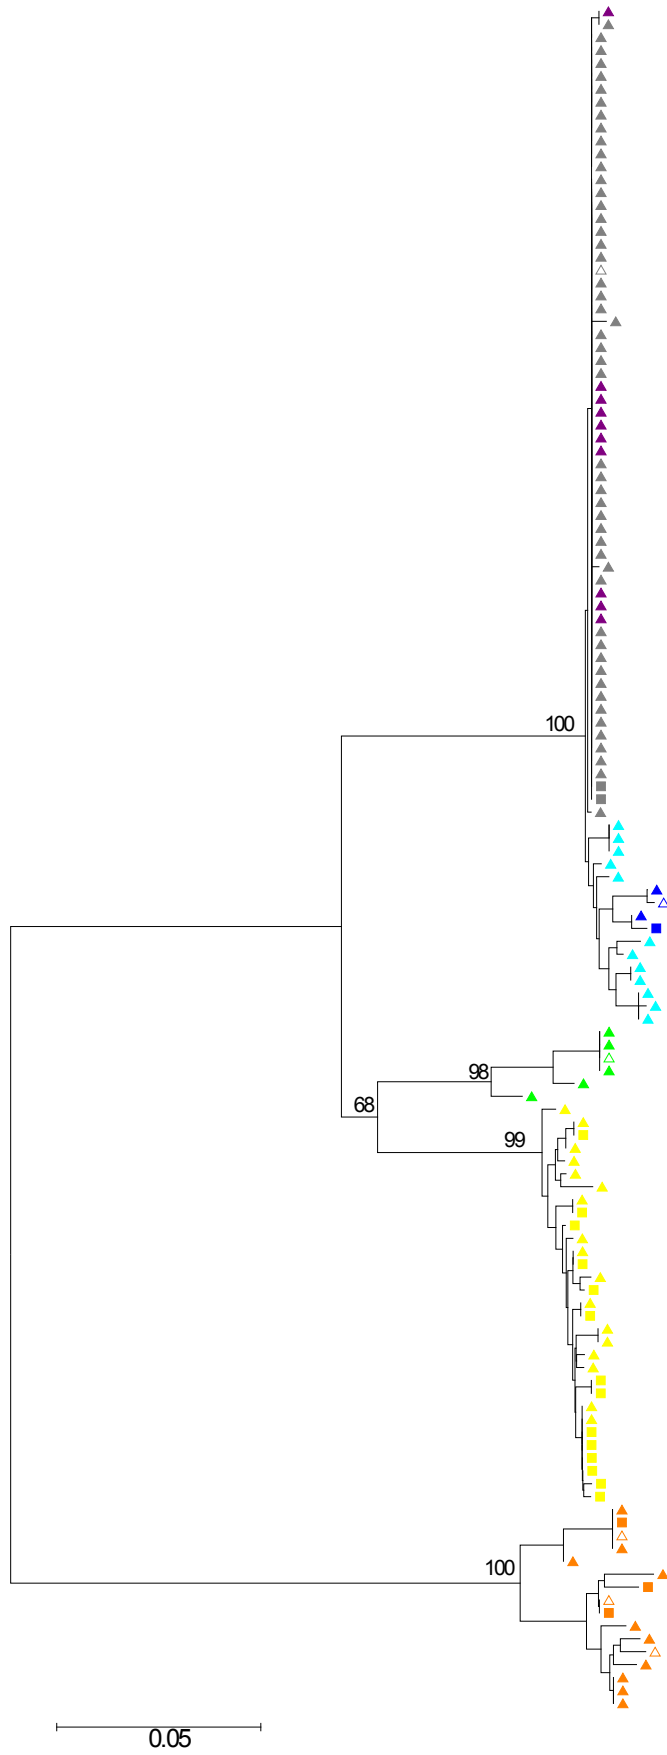

Fig. S1d (pyk)

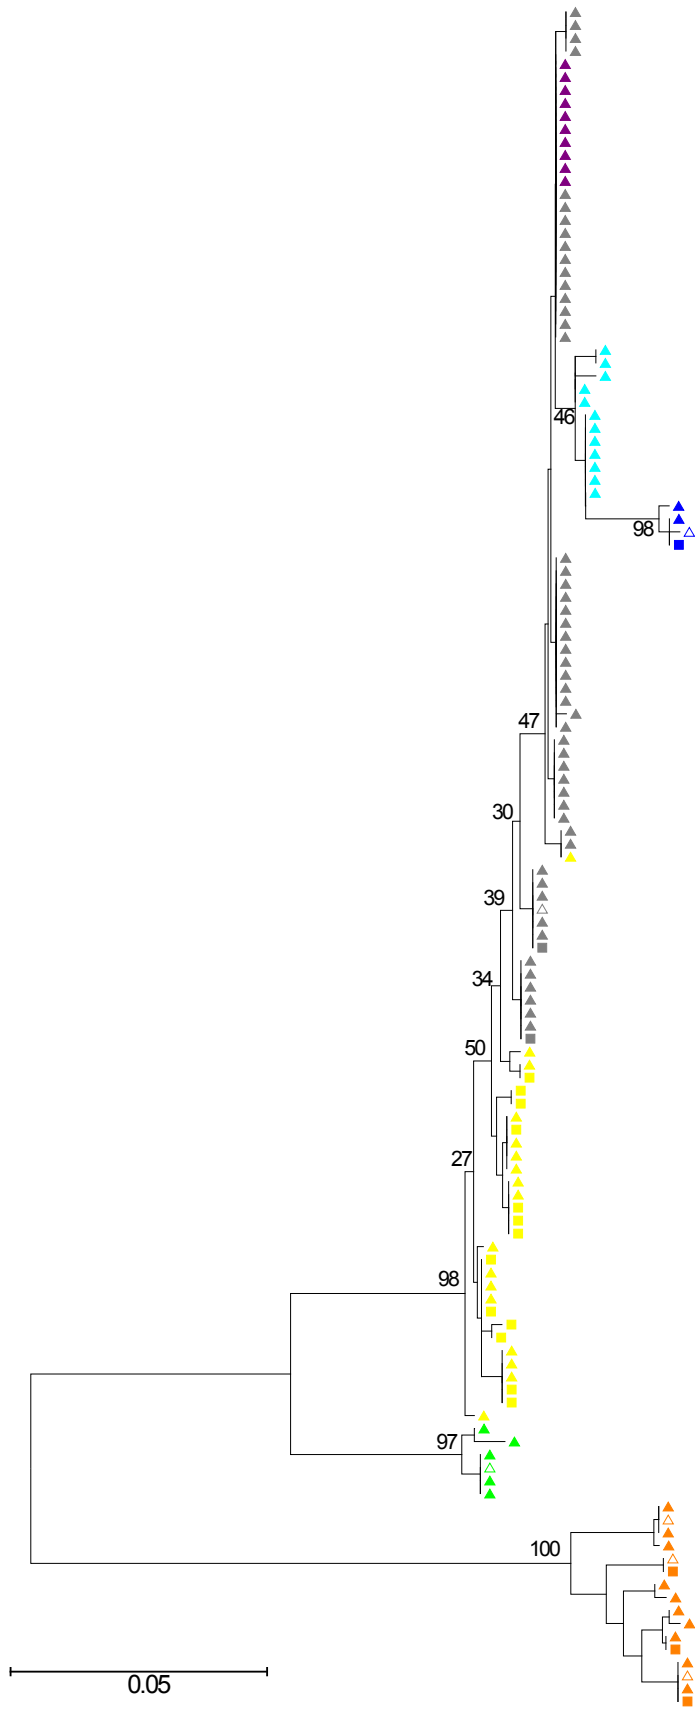

Fig. S1e (*rpoB*)

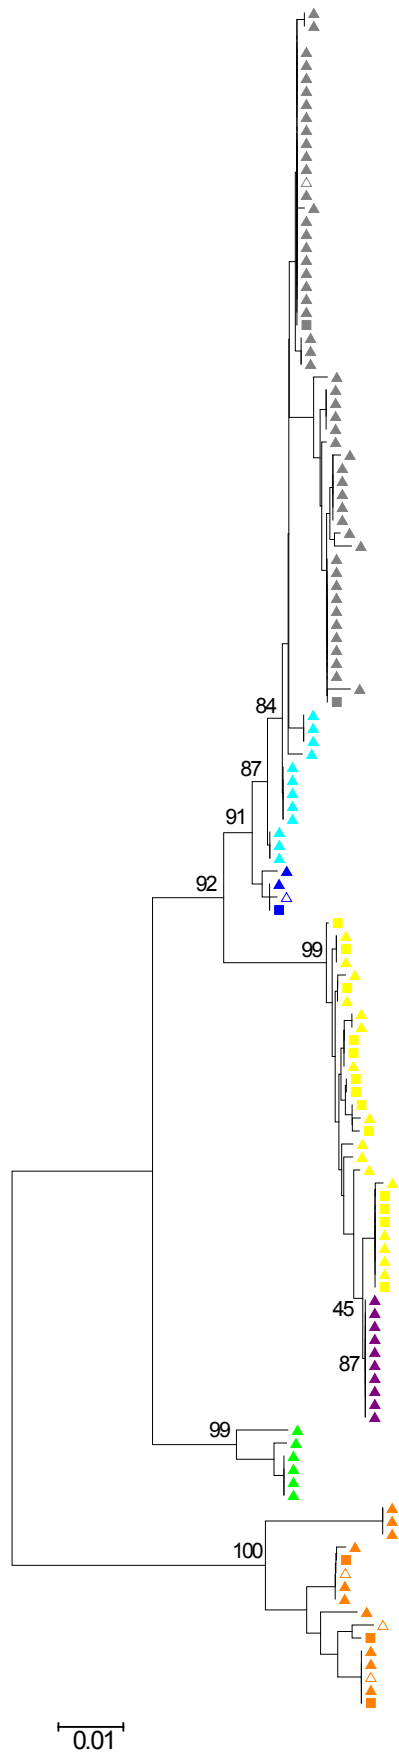



Fig. S1f (*sodA*)

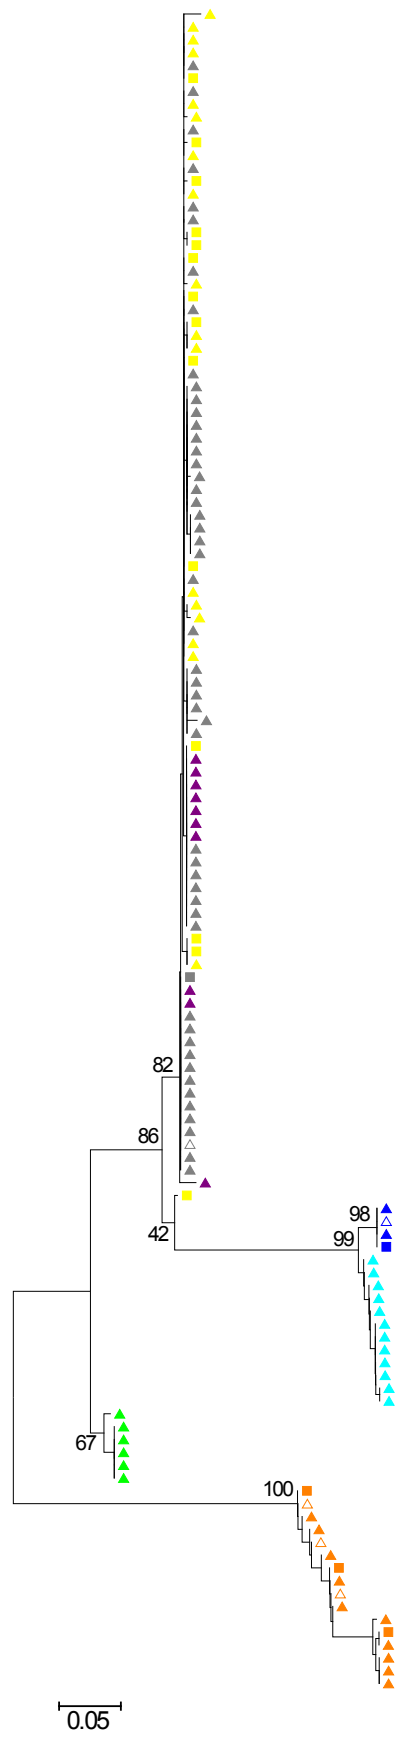

Fig. S1g (*tuf*)

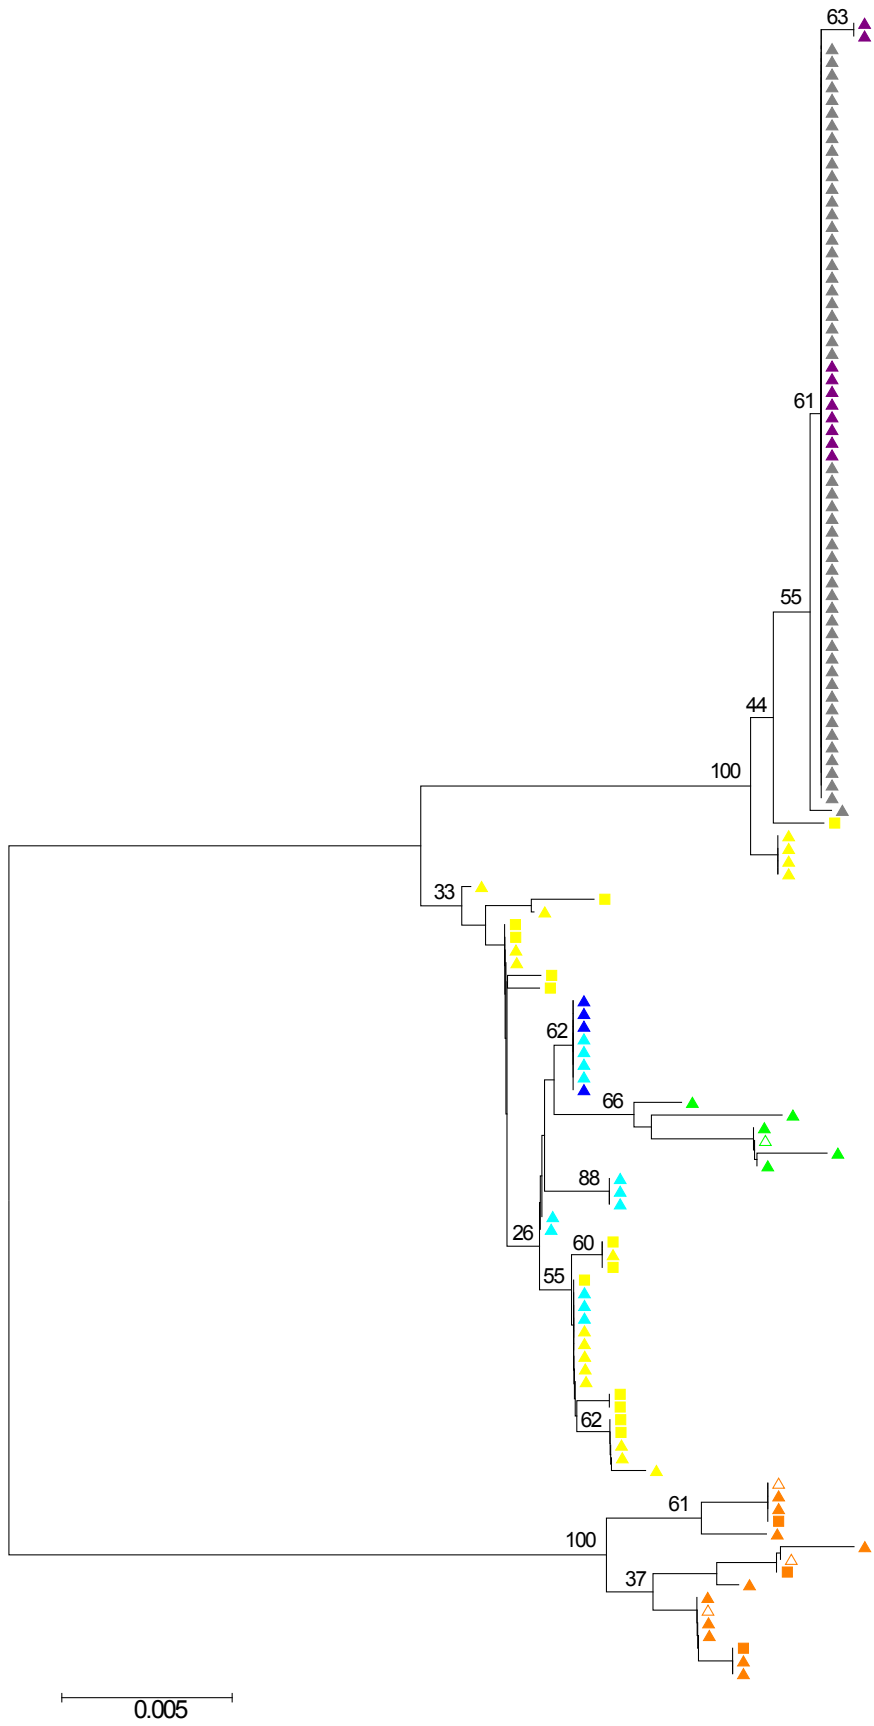

Supplement: supp_50.1.113_JCM5900-11_supp_mat.pdf [file supp_50.1.113_JCM5900-11_supp_mat.pdf]
